# Supplementary material for: Hexagonal boron nitride nanoplates as emerging biological nanovectors and their potential applications in biomedicine
Source: Royal Society of Chemistry journal article supplement (doi:10.1039/c6tb01481j), 2016-01-01
Supplement: c6tb01481j1.pdf [file c6tb01481j1.pdf]

## Supplementary Information

### **Hexagonal boron nitride nanoplates as emerging biological nanovectors and their potential applications in biomedicine**

*Tun Lu, <sup>a</sup> Libo Wang, <sup>a</sup> Ye Jiang, <sup>a</sup> Qiuwen liu <sup>b</sup> and Caijin Huang <sup>\*b</sup>*

<sup>a</sup> College of Biological Science and Engineering, Fuzhou University, Fuzhou 350002, P. R. China.

<sup>b</sup> State Key Laboratory of Photocatalysis on Energy and Environment, College of Chemistry, Fuzhou University, Fuzhou 350002, P. R. China.

\*To whom correspondence should be addressed.

E-mail: [cjhuang@fzu.edu.cn](mailto:cjhuang@fzu.edu.cn)

**BSA release assay.**

Typically, 10 mg of BSA@BN powder was dissolved in 1 ml of phosphate buffer solutions (PBS) at pH 5.4, 7.4, and 8.4. The solutions were incubated at 37 °C. At fixed time intervals (1, 2, 4, 6, 24 and 48 h), they were centrifuged at 16200 g min<sup>-1</sup> for 10 min. The supernatants were analyzed at 280 nm using a UV-Vis spectrophotometer to determine the concentration of the released BSA.

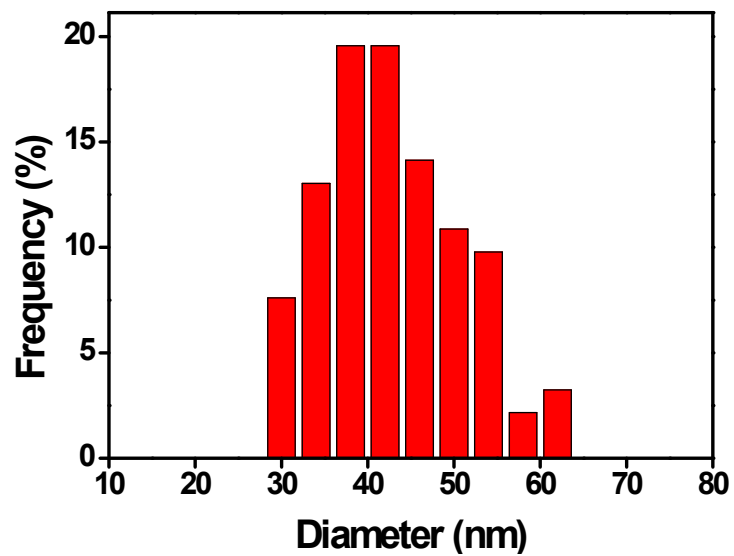

**Figure S1** Statistical diameter histogram obtained from TEM data by measuring 100 nanoplates. The histogram shows that the nanoplate diameters are dispersed from 30 to 60 nm with a broad peak at 40 nm.

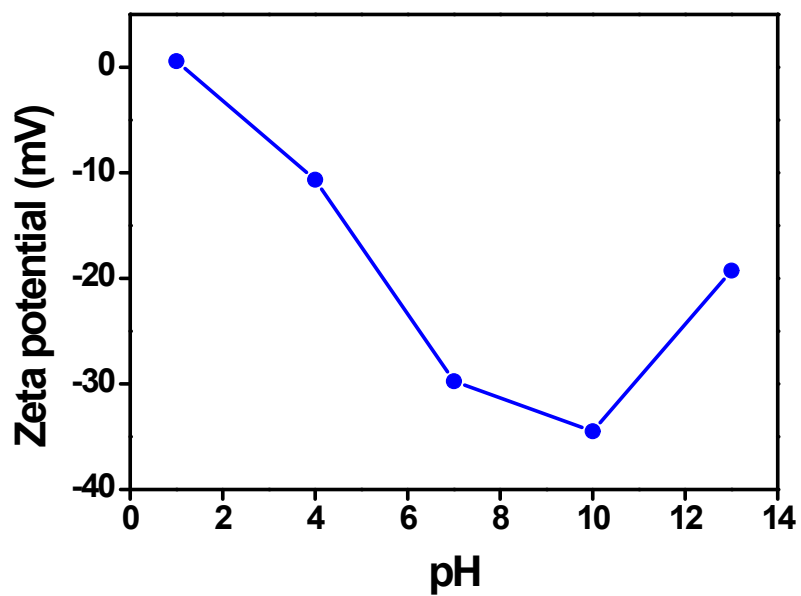

**Figure S2** Zeta potential of *h*-BN nanoplate colloid ( $0.02 \text{ mg ml}^{-1}$ ).

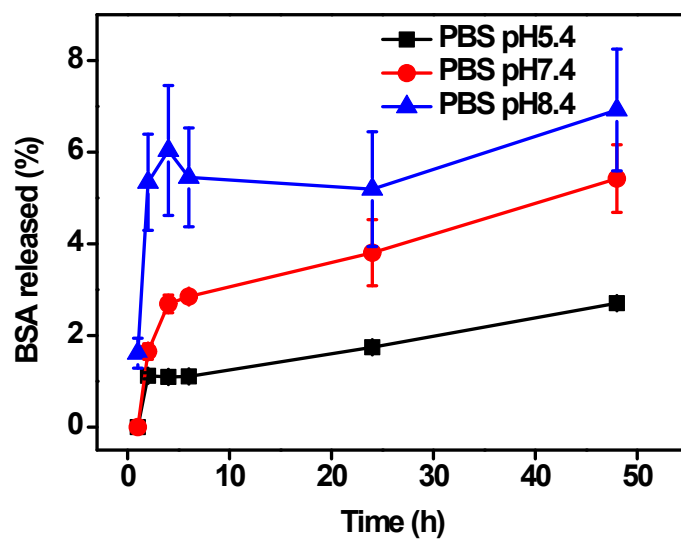

**Figure S3** Cumulative percent *in vitro* release of BSA from *h*-BN nanoparticles at 37 °C in PBS solutions at different pH levels.
